# Supplementary material
Source: PubMed Central journal article supplement (PMC8106130)
Supplement: NIHMS1688958-supplement-1.pdf [file NIHMS1688958-supplement-1.pdf]

# Enrollment/Study Timeline

21 patients total (1 without exit biopsy)

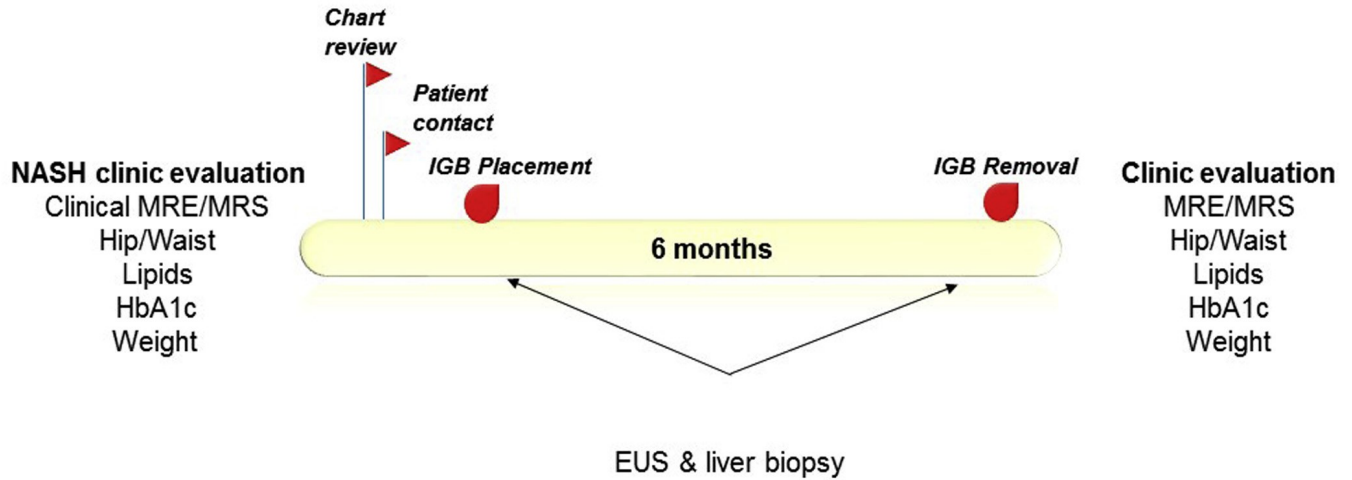

Supplementary Figure 1. Study enrollment timeline and interventions.

**Supplementary Table 1.** Histological NAS and Fibrosis Scoring Systems

| NAS                            |                                                          |       |
|--------------------------------|----------------------------------------------------------|-------|
| Histological Features          | Description                                              | Score |
| Steatosis %                    | <5                                                       | 0     |
|                                | 5–33                                                     | 1     |
|                                | 33–66                                                    | 2     |
|                                | >66                                                      | 3     |
| Ballooning                     | None                                                     | 0     |
|                                | Moderate                                                 | 1     |
|                                | Severe                                                   | 2     |
| Inflammation                   | None                                                     | 0     |
|                                | <2 foci                                                  | 1     |
|                                | 2–4 foci                                                 | 2     |
|                                | >4 foci                                                  | 3     |
| Total                          |                                                          | = NAS |
| <b>Fibrosis scoring system</b> |                                                          |       |
| Stage                          | Histological Findings                                    |       |
| 1a                             | Mild pericellular fibrosis                               |       |
| 1b                             | Moderate pericellular fibrosis                           |       |
| 1c                             | Portal/periportal fibrosis without pericellular fibrosis |       |
| 2                              | Pericellular and portal/periportal fibrosis              |       |
| 3                              | Bridging fibrosis                                        |       |
| 4                              | Cirrhosis                                                |       |

NAS, NAFLD Activity Score.

**Supplementary Table 2.** Baseline NAS and Component Scores

|              | 0    | 1     | 2    | 3    | 4    | 5    |
|--------------|------|-------|------|------|------|------|
| NAS          | 0/21 | 0/21  | 1/21 | 9/21 | 5/21 | 6/21 |
| Steatosis    | 1/21 | 14/21 | 6/21 | —    | —    | —    |
| Ballooning   | —    | 14/21 | 7/21 | —    | —    | —    |
| Inflammation | —    | 17/21 | 4/21 | —    | —    | —    |
| Fibrosis     | 0/21 | 9/21  | 7/21 | 5/21 | 0/21 | v    |

Values are n/N.  
NAS, NAFLD Activity Score.**Supplementary Table 3.** Post-IGB NAS and EUS-LB Fibrosis Scores

|              | 0     | 1    | 2    | 3    | 4    | 5    |
|--------------|-------|------|------|------|------|------|
| NAS          | 8/20  | 5/20 | 2/20 | 2/20 | 3/20 | 0/20 |
| Steatosis    | 11/20 | 9/20 | —    | —    | —    | —    |
| Ballooning   | 15/20 | 3/20 | 2/20 | —    | —    | —    |
| Inflammation | 11/20 | 8/20 | 1/20 | —    | —    | —    |
| Fibrosis     | 2/20  | 5/20 | 7/20 | 4/20 | 2/20 | —    |

Values are n/N.  
EUS, endoscopic ultrasound; IGB, intragastric balloon; LB, liver biopsy; NAS, NAFLD Activity Score.
